# Supplementary material for: Single-Cell RNA Sequencing Reveals HIF1A as a Severity-Sensitive Immunological Scar in Circulating Monocytes of Convalescent Comorbidity-Free COVID-19 Patients
Source: MDPI journal article supplement (doi:10.3390/cells13040300), 2024-02-06
Supplement: s1 [file s1]

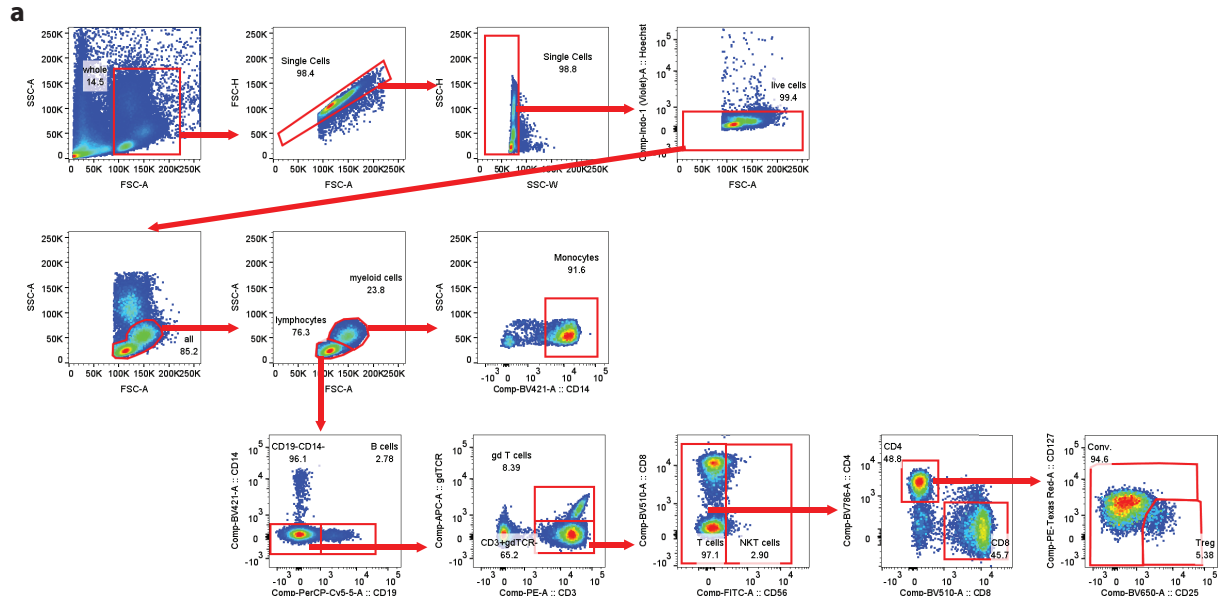

**Figure S1. Flow cytometric gating strategy for immune cell subsets.**

(a) Cells were selected via FSC-A and FSC-H together with SSC-W and SSC-H; viable cell staining for Hoechst 33258 live/dead dye. Lymphocytes myeloid cells were gated based on FSC-A and SSC-A. Monocytes were identified as CD14<sup>+</sup> within the myeloid cell population. Within the lymphoid subsets, B cells were identified as CD19<sup>+</sup> cells;  $\gamma\delta$  T cells were identified as CD3<sup>+</sup> $\gamma\delta$ TCR<sup>+</sup> cells; NK T cells were identified as CD3<sup>+</sup>CD56<sup>+</sup> cells; CD8<sup>+</sup> gates for CD8 T cell subsets; CD4<sup>+</sup>CD127<sup>+</sup>CD25<sup>+</sup> gates for regulatory T cells; CD4<sup>+</sup>CD25<sup>+</sup> gates for CD4<sup>+</sup> T cell subsets. (b) Antibody staining panel used for flow cytometry.

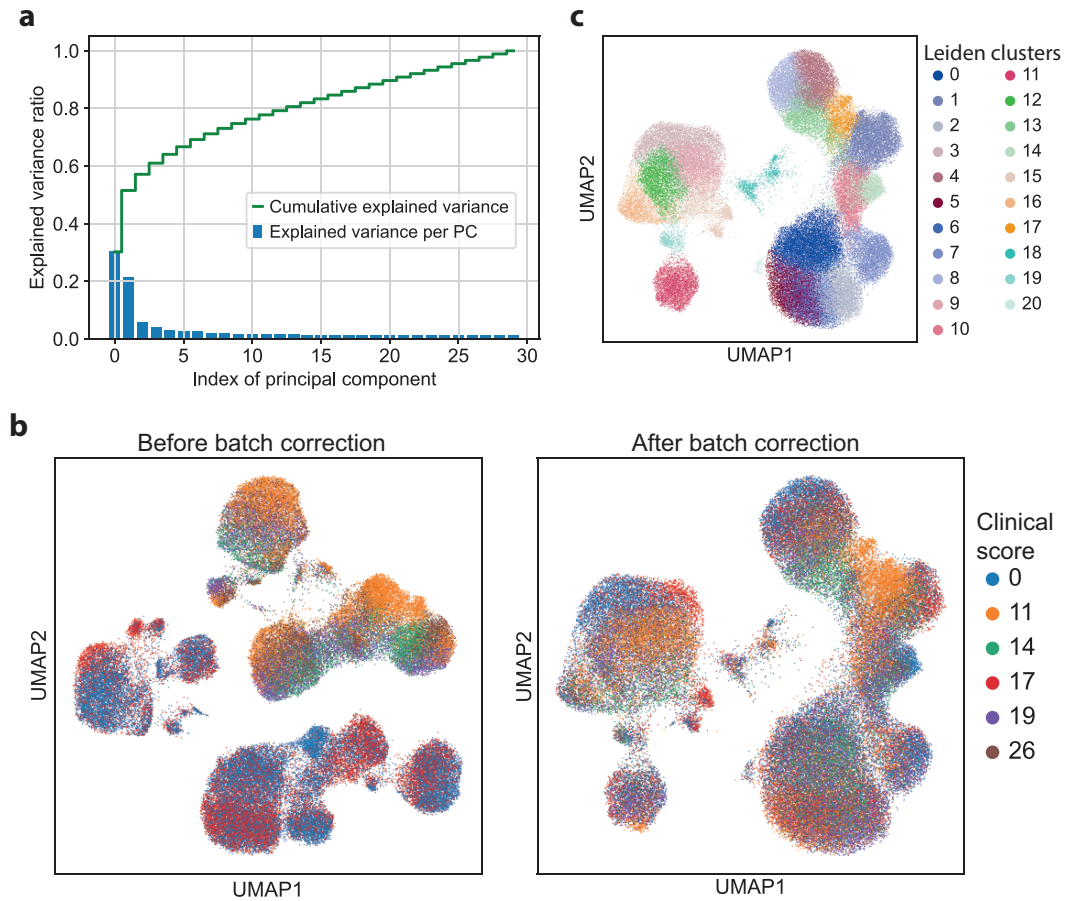

**Figure S2. ScRNA-seq data were preprocessed using PCA, UMAP and Leiden clustering.**

**(a)** Explained variance ratio for each principal component (PC) and cumulative explained variance of a principal component analysis with 30 PCs. **(b)** UMAP representation of all cells before (left) and after (right) batch correction for two batches. The first batch consisted of patients with clinical scores of 0 and 17, and the second batch consisted of four patients with clinical scores of 11, 14, 19 and 26. **(c)** UMAP representation of all cells, colored by Leiden clusters calculated with a resolution of 1.5.

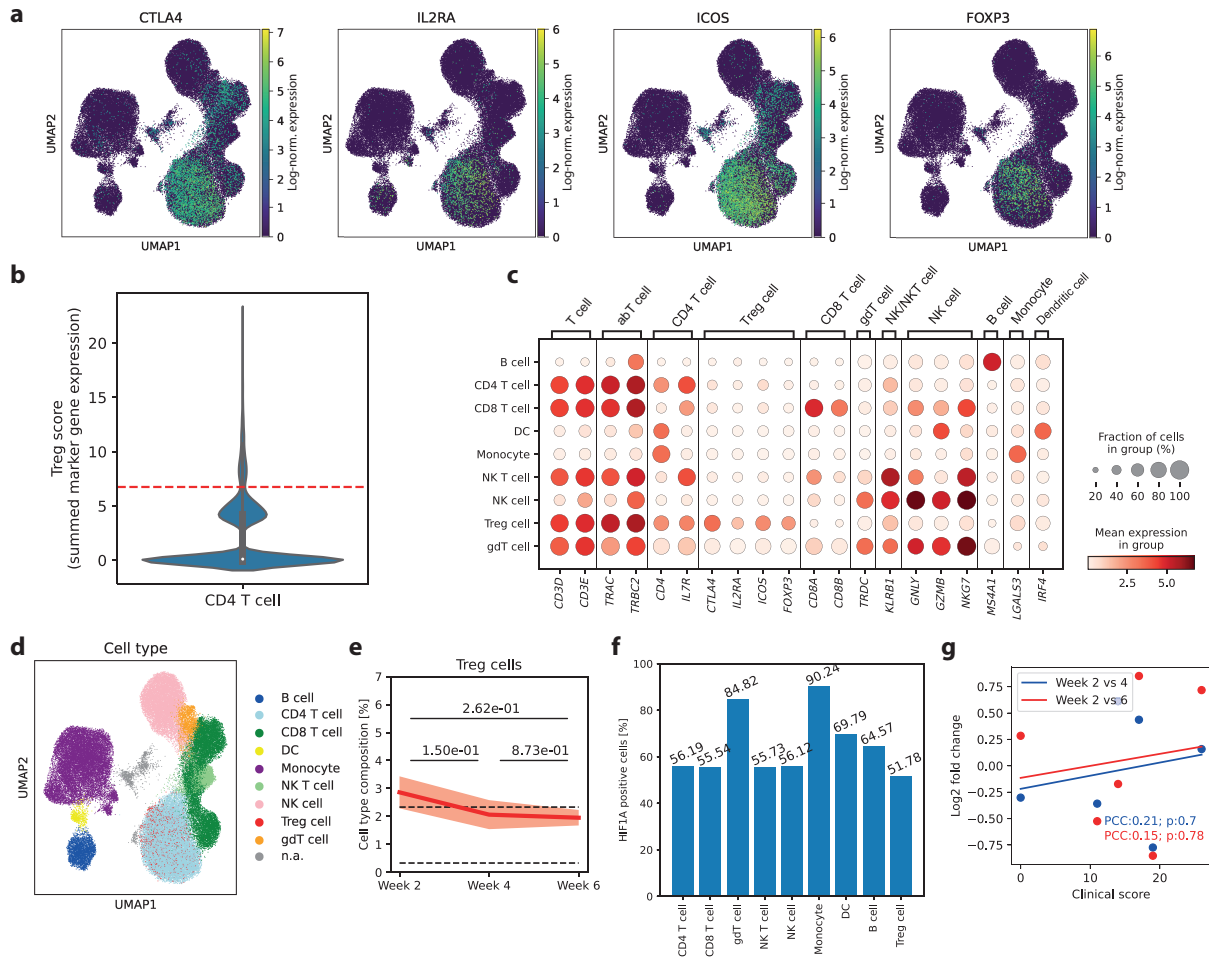

**Figure S3. A Treg cell subpopulation is identifiable among the CD4<sup>+</sup> T cell population but does not exhibit severity-sensitive *HIF1A* expression.**

(a) Log-normalized expression of the Treg marker genes *CTLA4*, *IL2RA*, *ICOS*, and *FOXP3* within the UMAP representation of all cells. (b) Violin plot depicting the summed-up log-normalized expression of the Treg marker genes *CTLA4*, *IL2RA*, *ICOS*, and *FOXP3* in all CD4<sup>+</sup> T cells, referred to as Treg score. A red horizontal line is plotted at the threshold we used to annotate the Treg cells, which are expected to exhibit high expression for the four genes. Cells surpassing this Treg score threshold were annotated as Treg cells. (c) UMAP representation of all cells, color-coded by cell type, including Treg cells as a subset of the CD4<sup>+</sup> T cell population. (d) Dotplot depicting the marker gene expression for each annotated cell type. (e) Relative Treg cell type frequency among all cells over time. The mean relative frequency of all patients  $\pm$  standard error is shown. For each pair of timepoints, a two-sided Wilcoxon rank sum test was performed. The dashed line indicates the range of physiological variation of the relative cell type frequency for the respective cell type. (f) Percentage of cells with *HIF1A* expression greater than zero for each cell type, including Treg cells as a distinct subset from CD4<sup>+</sup> T cells. (g) Log2-fold change (y-axis) of the mean log-normalized *HIF1A* expression in Treg cells in week 2 compared to week 4 (blue) and week 6 (red) depending on the clinical score of the patient (x-axis). The trend of the datapoints is indicated by a linear regression (line). The strength of correlation is described by the Pearson's correlation coefficient (PCC) and p value (p).

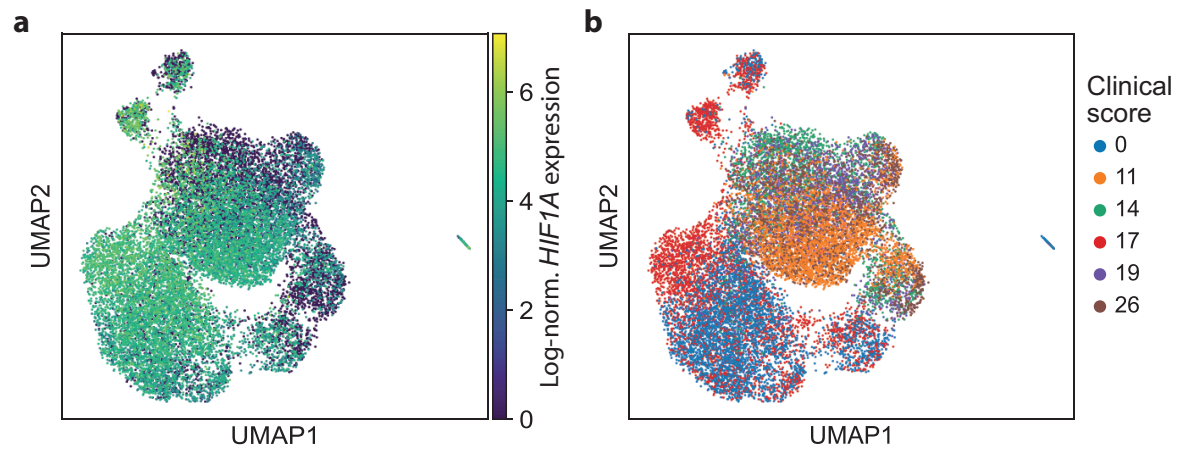

**Figure S4. Clustering of the monocyte subpopulation is mainly associated with interindividual differences between patients.**

**(a)** Log-normalized *HIF1A* expression in the UMAP representation of the monocytes after calculating a neighbor graph. **(b)** Patient distribution, represented by the respective clinical score in the UMAP representation of the monocytes after calculating a neighbor graph.

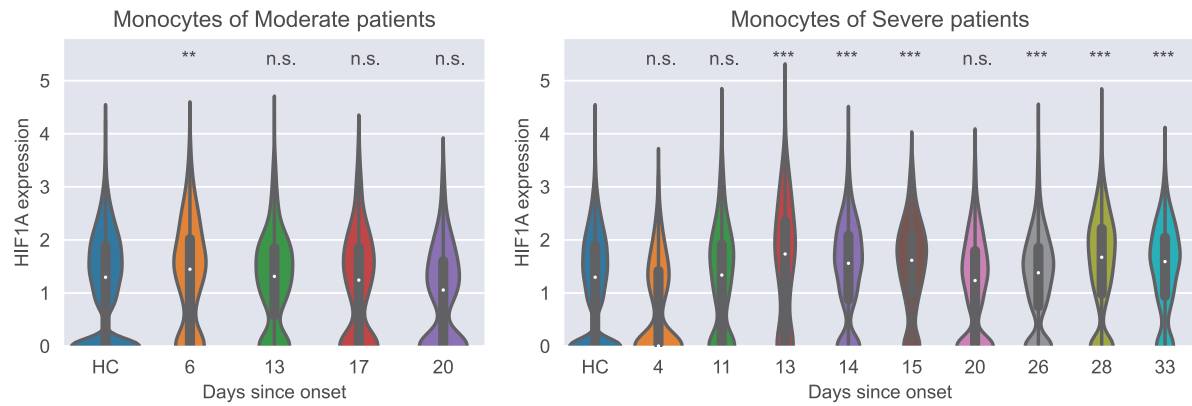

**Figure S5. Identification of *HIF1A* as a symptom-severity-sensitive immunological scar is supported by the analysis of a publicly available COVID-19 scRNA-Seq dataset, incorporating a comparison with healthy control patients.**

Violin plots indicating *HIF1A* expression in monocytes of COVID-19 patients with a moderate (left) or severe (right) disease course. Each plot includes the expression in healthy controls (HC) on the left. Statistics refer to Wilcoxon Rank Sum Tests with the alternative hypothesis that *HIF1A* expression in healthy controls is lower than in patients at the respective time point (\*\*= $p < 0.01$ ; \*= $p < 0.05$ ; n.s.= $p > 0.05$ ).

**Table S1. Characteristics and symptom scores for the six convalescent COVID-19 patients in our cohort.**

Age, hospitalization status, WHO severity score, and our custom clinical score, which is sensitive to severity differences in the mild to moderate range, along with individual symptom scores for each of the six patients in our patient cohort. To calculate our symptom severity score, patients completed a physician-assisted questionnaire in which they assigned scores ranging from 0 to 3 to 15 frequently observed COVID-19 symptoms. A score of 3 indicated the symptom's strongest manifestation. Individual symptom scores were subsequently summed to yield the total clinical score, falling within the range of 0 to 45.

**Table S2. The custom primer panel comprises 98 additional genes.**

The 98 genes that constitute the custom-designed primer panel, in combination with the predesigned Human T Cell Expression Primer Panel from BD Biosciences, enable an in-depth analysis of immune cell lineage annotations, T cell residency, immune cell metabolism, and immune functions.

Table\_S1

[illegible]

Table\_S2

| geneID |
|--------|
| ABCB1  |
| ABCC1  |
| AHR    |
| ANTXR1 |
| AOC3   |
| AREG   |
| ATXN1  |
| BACH2  |
| BATF   |
| BCL2L1 |
| BIRC3  |
| CAPG   |
| CASP1  |
| CASP12 |
| CASP8  |
| CCL17  |
| CCL22  |
| CD101  |
| CD28   |
| CD34   |
| CD38   |
| CRTAM  |
| CYP1A1 |
| DEPTOR |
| FABP5  |
| FUT7   |
| GBP1   |
| GCLC   |
| HAVCR1 |
| HIF1A  |
| HSPA1A |
| ID2    |



|        |
|--------|
| ID3    |
| IFNAR1 |
| IFNAR2 |
| IGF1   |
| IKBKB  |
| IKBKE  |
| IKZF3  |
| IL10   |
| IL1A   |
| IL1B   |
| IRAK4  |
| ITGA1  |
| ITGB1  |
| ITGB7  |
| JAK1   |
| JAML   |
| KLF2   |
| KRT14  |
| MAF    |
| MAP3K7 |
| MAPK1  |
| MET    |
| MS4A1  |
| MTOR   |
| MYD88  |
| NCAM1  |
| NFAT5  |
| NLRP3  |
| NOD1   |
| NOD2   |
| NOTCH1 |
| NR4A1  |
| NRP1   |
| P2RX7  |

|         |
|---------|
| PAG1    |
| PRKCD   |
| PTK7    |
| PYCARD  |
| RARA    |
| RELA    |
| RIPK1   |
| RPS4Y1  |
| RPTOR   |
| RXRA    |
| S100A4  |
| SGK1    |
| SLC2A1  |
| STAM2   |
| STAT2   |
| TAB1    |
| TBK1    |
| TLR4    |
| TLR7    |
| TLR8    |
| TMEM173 |
| TOX     |
| TRAF2   |
| TRAF5   |
| TSLP    |
| TYK2    |
| TYR     |
| VDAC1   |
| XCL2    |
| XIST    |
| ZBTB7B  |
| ZEB2    |
